# Supplementary material
Source: PubMed Central journal article supplement (PMC6397426)
Supplement: NIHMS1009669-supplement-suppl_figures.pdf [file NIHMS1009669-supplement-suppl_figures.pdf]

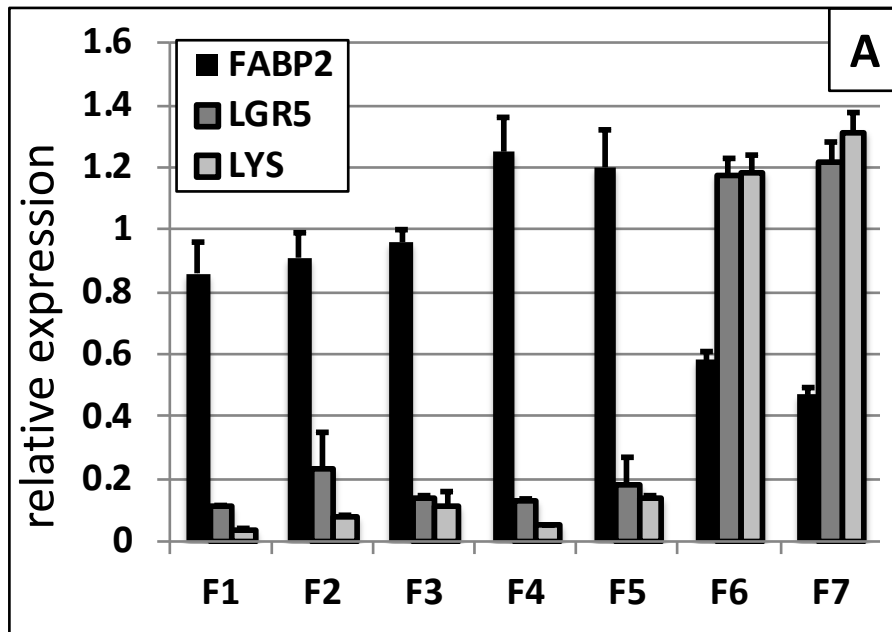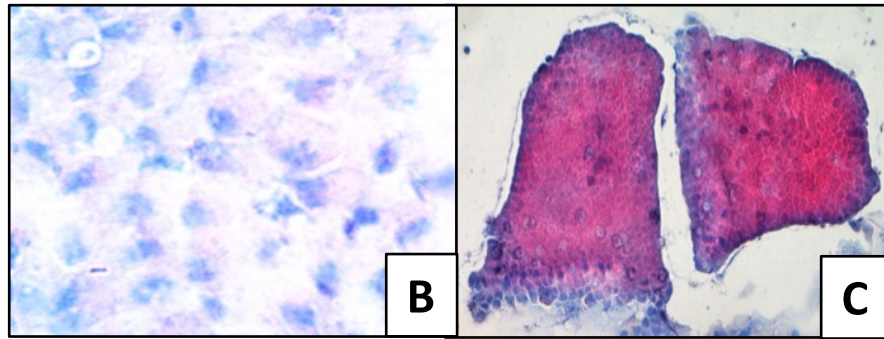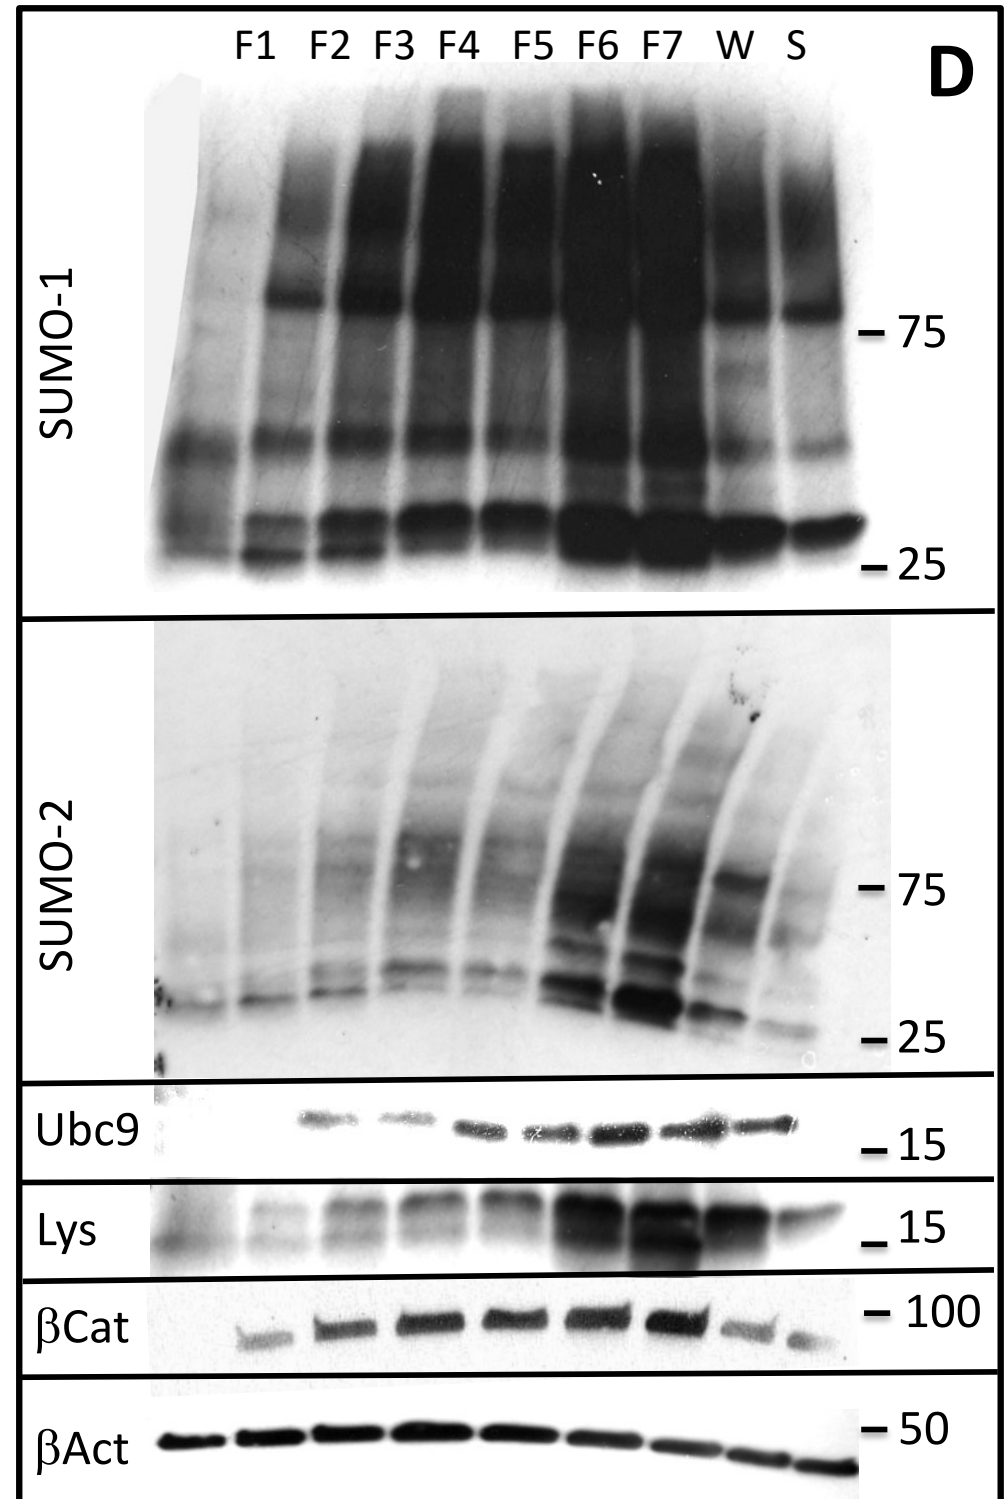

**Supplemental Figure 1: Analysis of epithelial fractions from murine small intestines.** (A) The small-intestinal epithelial layer was isolated in fractions along the crypt-villus axis, RNA was isolated and RT-qPCR performed using primers for intestinal fatty acid binding protein (FABP2), Leucine-rich repeat-containing G-protein coupled receptor 5 (LGR5) or lysozyme (LYZ) each normalized to  $\beta$ Actin as internal control. Fractions were designated in a villus tip to crypt direction F1-7. Representative H&E staining of fraction 1 (B), and fraction 7 (C). Magnification 400x (D) The small-intestinal epithelial fractions were analyzed by Western blotting using specific antibodies directed against SUMO1, SUMO2/3, Ubc9, Lysozyme (Lys),  $\beta$ Catenin ( $\beta$ Cat) and  $\beta$ Actin ( $\beta$ Act). Fractions were compared to lysates from whole small intestine (W) or small intestinal mucosal scrapings (S). Markers denote molecular weight in kilo Dalton.

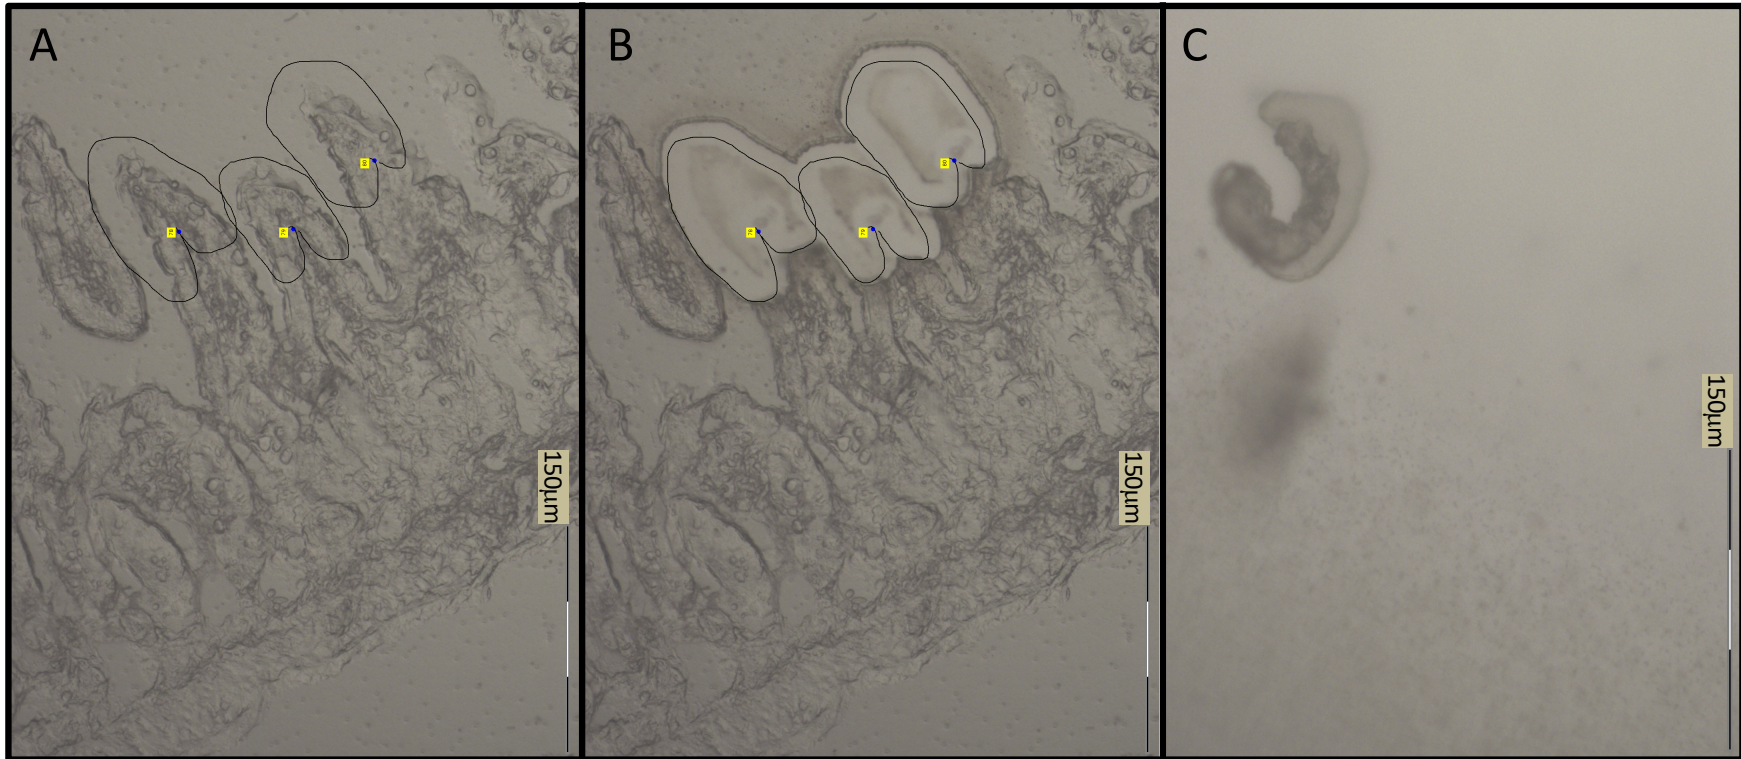

**Supplemental Figure 2: Laser microdissection and capture of intestinal epithelial villus tip epithelia.** Brightfield images of deparaffinized sections from post-ischemic small intestinal samples: **(A)** before microdissection with markings denoting the cutting path, **(B)** after microdissection and capture, and **(D)** captured villus tip sample. Magnification 200x in A and B and 400x in C.

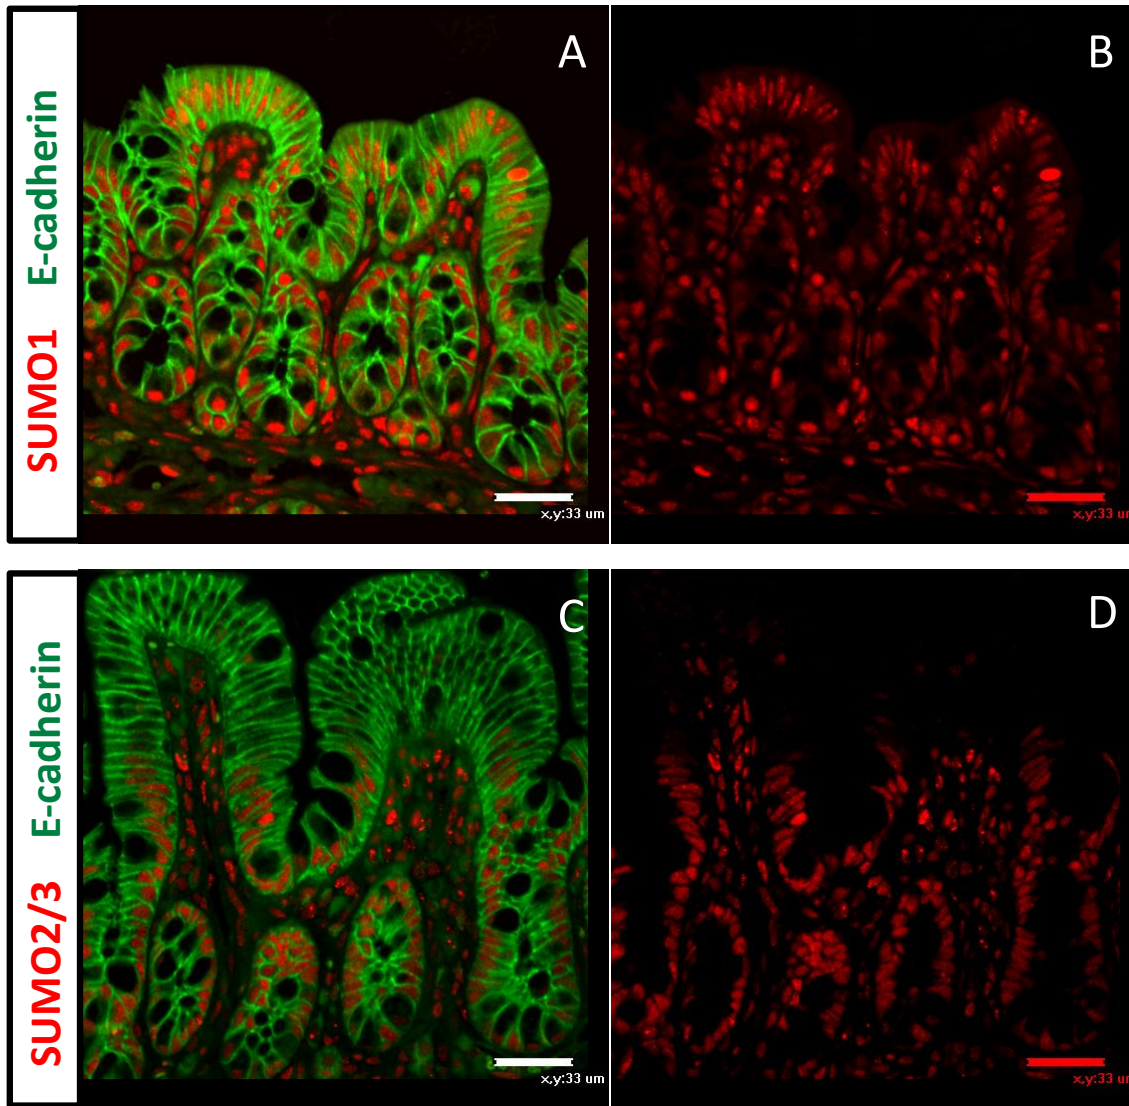

**Supplemental Figure 3: SUMO1 and SUMO2/3 distribution in murine large intestine.** Immunostaining of small intestinal sections from animals that were paraformaldehyde-perfused via transcardiac puncture. Sections were stained as indicated with e-cadherin (green), and either SUMO1 (red: **A,B**) or SUMO2/3 (red: **C,D**). Magnification 600x

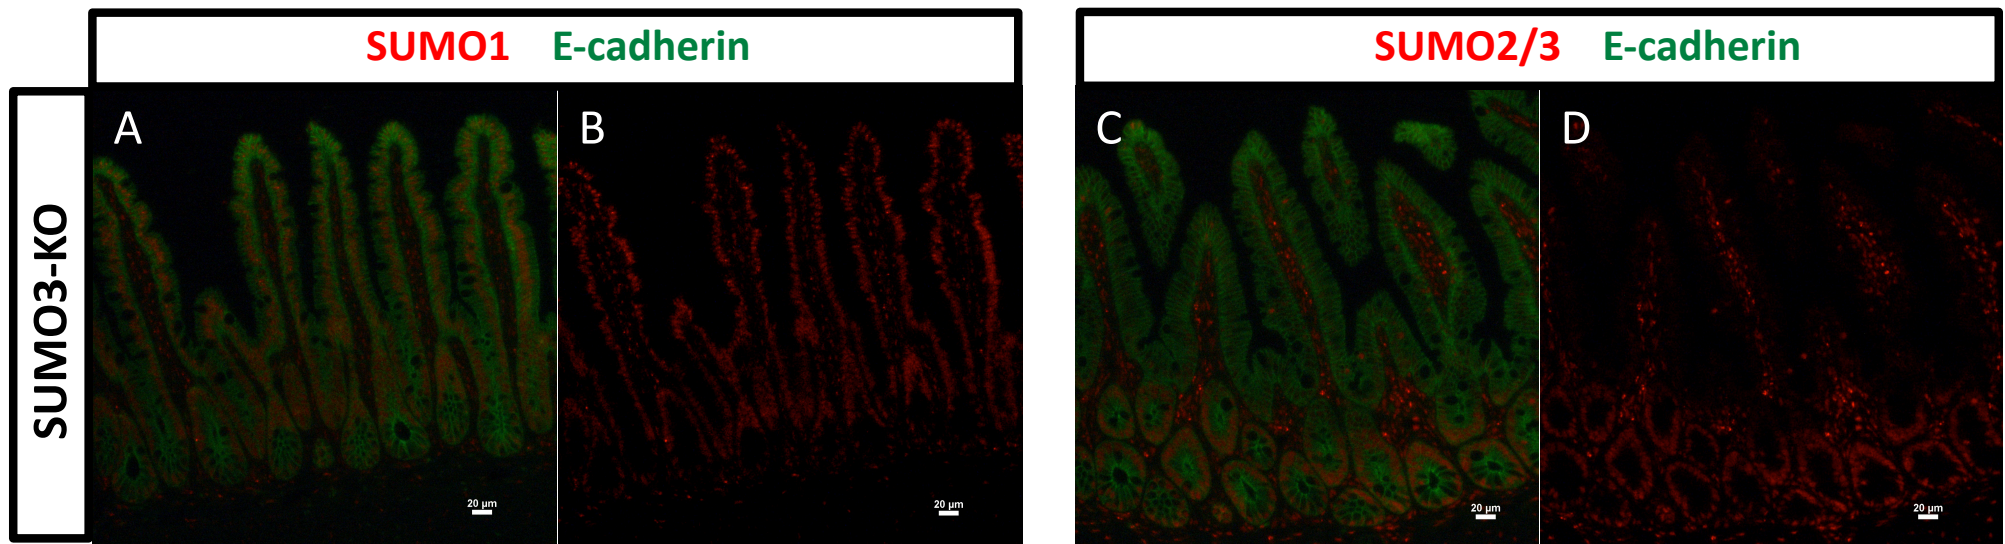

**Supplemental Figure 4: Redundancy between SUMO paralogs.** Immunostaining of small intestinal sections from SUMO3 (A-D) knock-out animals using antibodies targeted against SUMO1, SUMO 2/3 as indicated and E-cadherin (green) for anatomical orientation. Magnification 400x

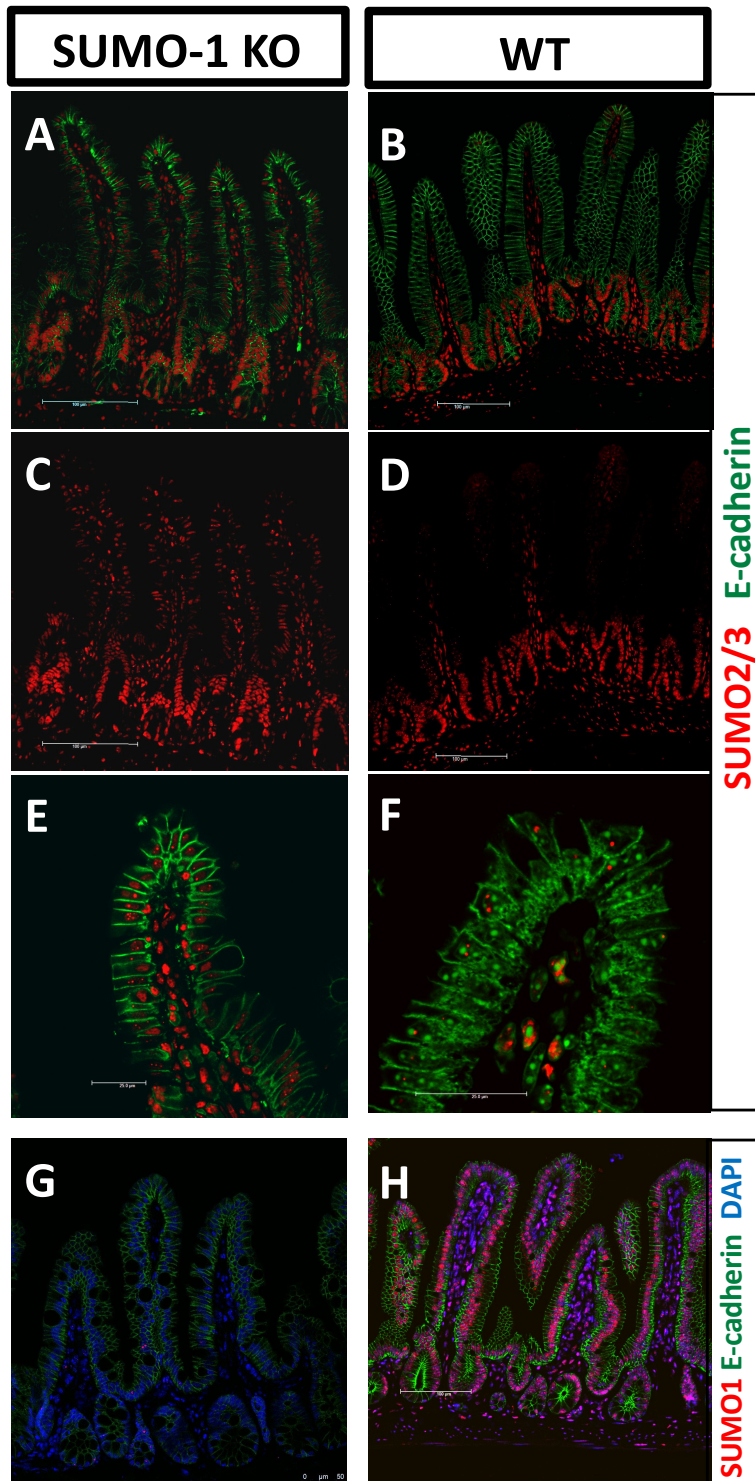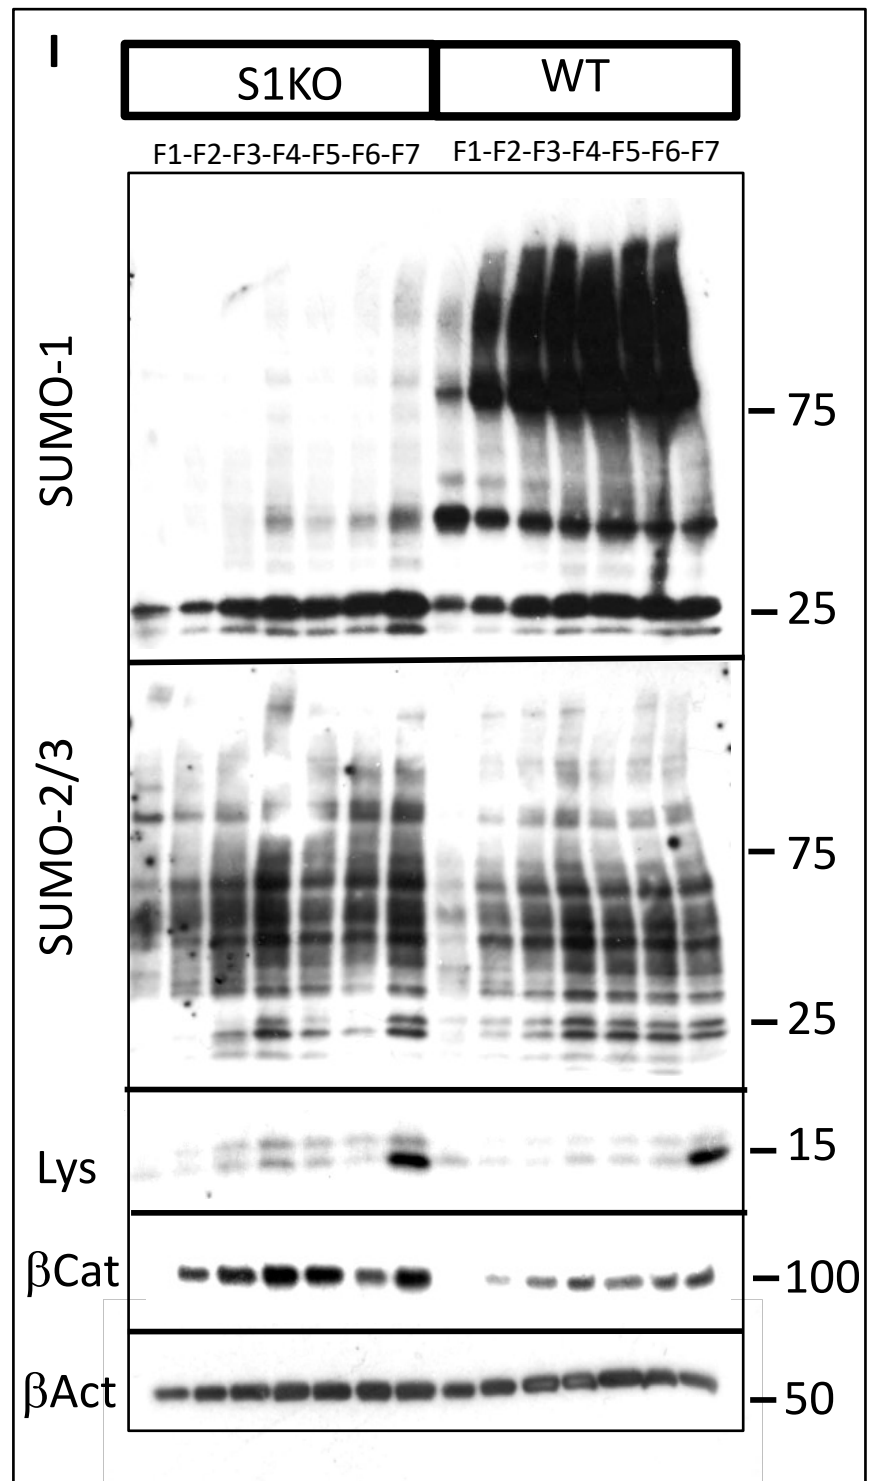

Supplemental  
Figure 5

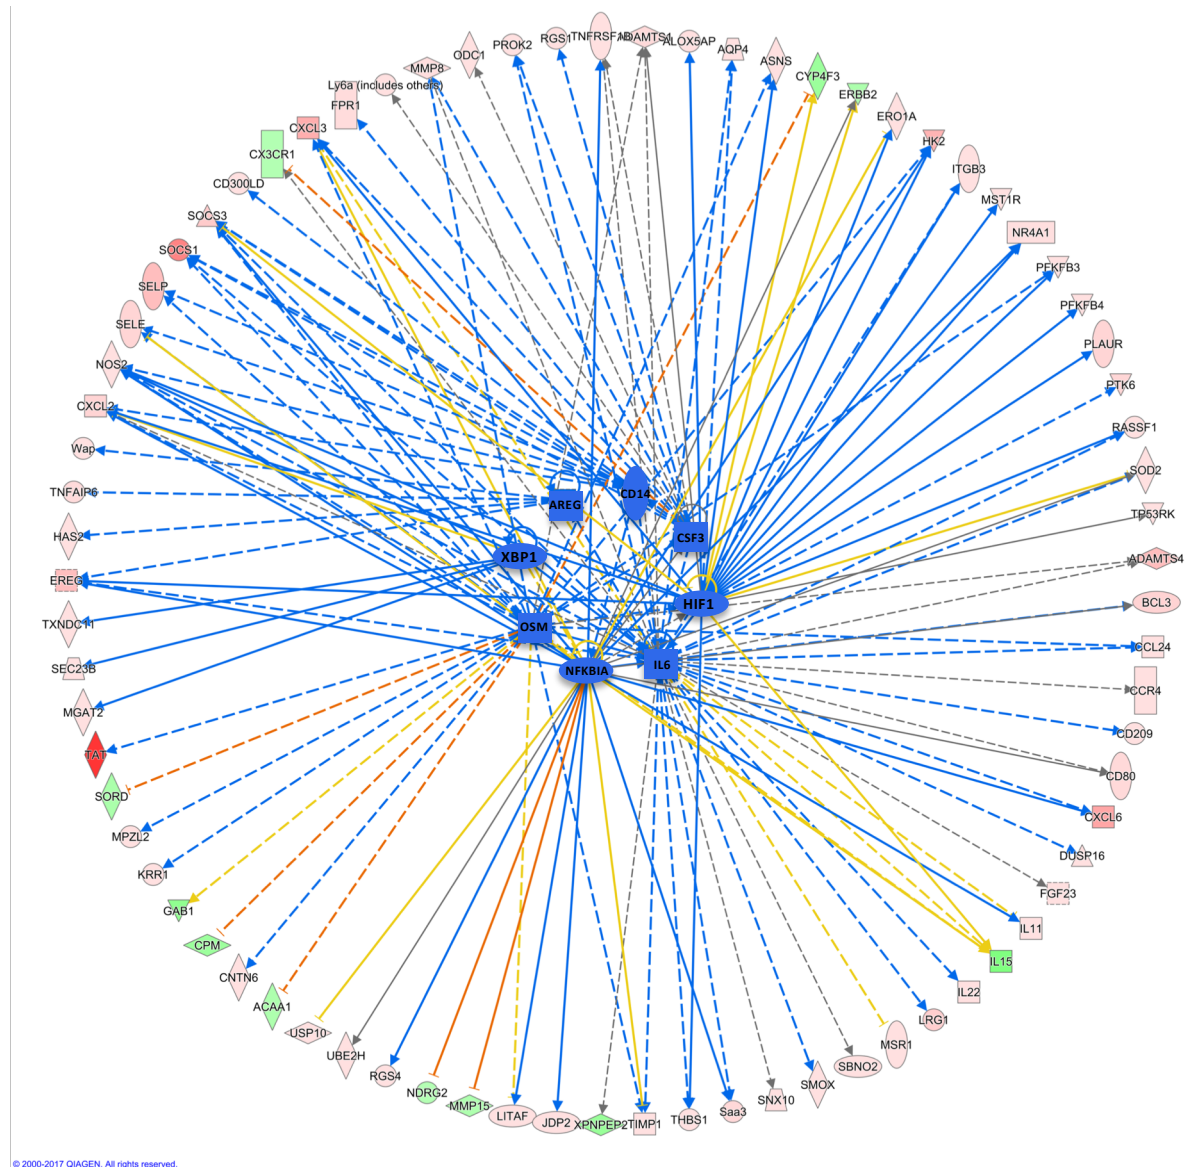

**Supplemental Figure 6: Ubc9 overexpression reduces inflammatory gene expression during recovery from I/R injury.** Candidate regulator network returned from IPA from the same dataset as in Figure 4 F and G. The outer ring includes colored-nodes (green=up-regulated, red=down-regulated) representing the genes predicted to be under the regulation of 8 regulators (blue-colored nodes).

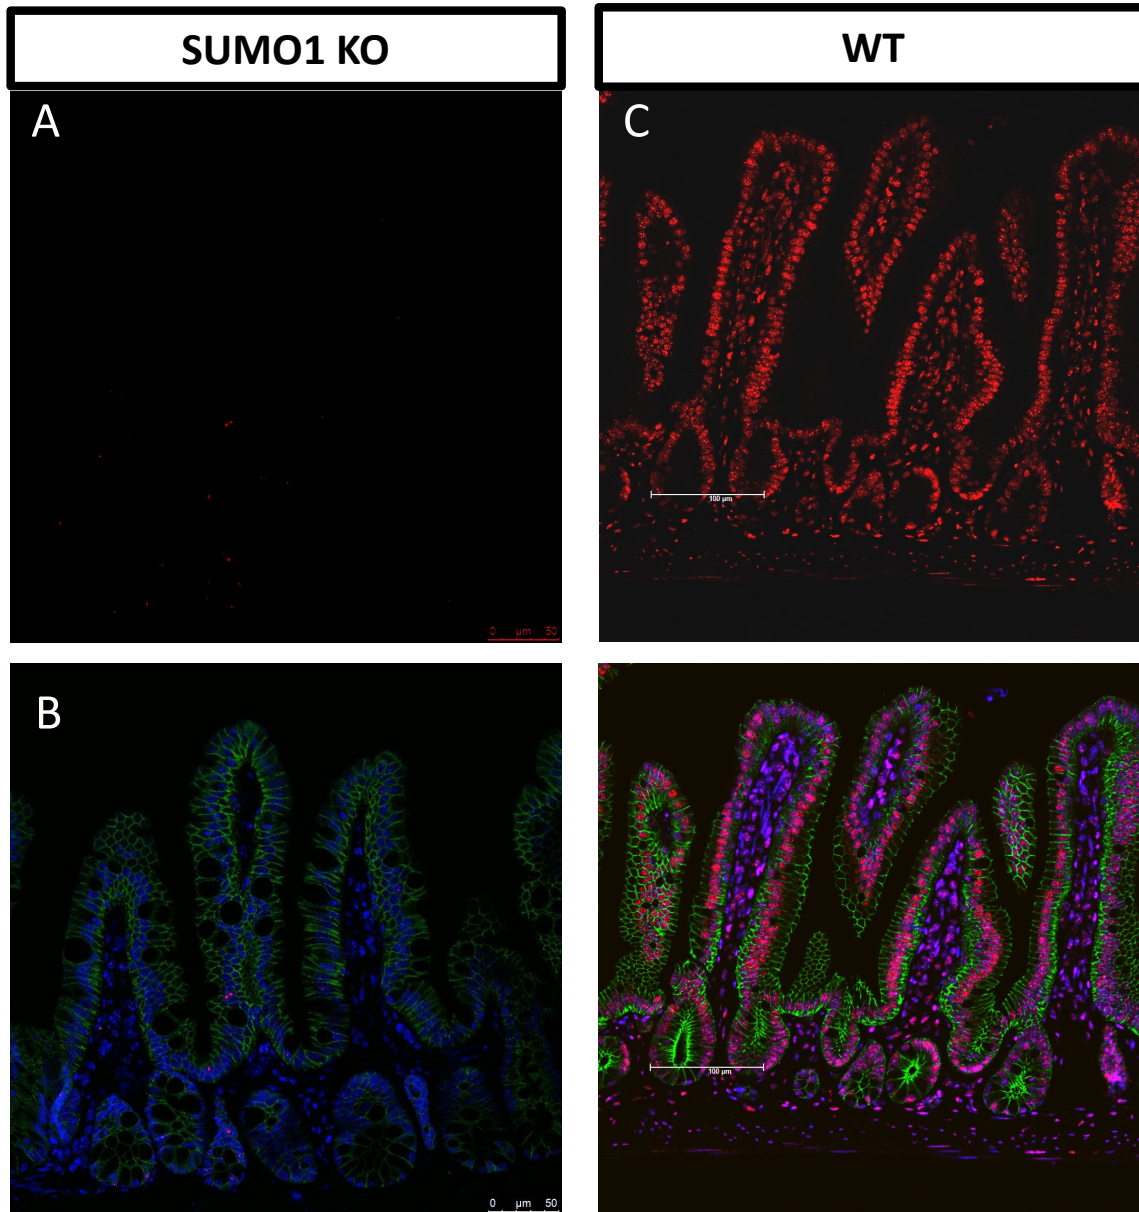

**SUMO1** **E-cadherin** **DAPI**

**Supplemental Figure 5: Lack of SUMO1 expression in SUMO1 knockout animals.**

Immunostaining of small intestinal sections from SUMO1 knock-out animals **(A,B)** using antibodies targeted against SUMO1 (red) and E-cadherin (green); DAPI (blue) is added for anatomical orientation. **(C, D)** representative images taken from WT animal. Magnification 200x.
